# Supplementary material
Source: HighWire-hosted journal article supplement (https://erj.ersjournals.com/content/49/4/1600965)
Supplement: inline-supplementary-material-1 [file inline-supplementary-material-1.pdf]

## ***Online supplement 1.***

### **EBC mediators in different diseases**

#### ***pH***

EBC pH has been investigated in variety of diseases [1]. De-aerated EBC pH is lower in acute asthma and normalises with corticosteroid treatment [2], whereas it is not lower in stable treated patients with severe and non-severe asthma in the Severe Asthma Research Program [3]. COPD patients present lower deaerated pH values than non-smokers without COPD [4]. EBC pH has been related to hyperinflation and air trapping in ex-smokers with COPD [5]. In longitudinal follow-up study, using EBC pH at standardised pCO<sub>2</sub> level, small changes could be followed in patients with COPD during exacerbations [6]. When the pH is determined by the CO<sub>2</sub> gas standardization method [7], no acidification in patients with COPD [8], CF [9], lung cancer [10] or bronchiolitis obliterans syndrome [11] can be detected. In contrast, exacerbation of asthma is associated with lower pH in the airways [6]. Between-day variability of EBC pH is similar among different groups of pulmonary patients [5-12].

#### ***Hydrogen peroxide and nitrogen oxides***

Hydrogen peroxide (H<sub>2</sub>O<sub>2</sub>) is a volatile marker of oxidative stress in EBC [1, 13]. H<sub>2</sub>O<sub>2</sub> in EBC is best measured during or immediately after collection, because its concentration decreases quickly and unpredictably in the sample [1, 14]. EBC H<sub>2</sub>O<sub>2</sub> is elevated in asthmatic patients; the meta-analysis of Teng et al. suggests a relationship between EBC H<sub>2</sub>O<sub>2</sub> and asthma severity and control [15]. EBC H<sub>2</sub>O<sub>2</sub> levels are also elevated in COPD patients and correlate with disease severity [16].

#### ***Nitric oxide related compounds in EBC***

Exhaled NO assays measure the quantity of NO that emanates from the airway and not the amount of NO that is formed. Consumptive processes – including oxidation reactions – may decrease the amount of gas phase NO available for exhalation. Higher oxides of nitrogen are resulting reaction products, and are easily measured in EBC.

Assessing all nitrogen oxides in exhaled breath provides more detailed interpretation of exhaled NO [17]. Furthermore, Carraro et al. showed that asymmetric dimethylarginine

(ADMA), which acts as endogenous inhibitor of NOS, was elevated in EBC of asthmatics supporting a role for ADMA in asthma pathogenesis [18].

#### ***Eicosanoids, isoprostanes, adenosine, ATP, other purines and lipid peroxidation products***

EBC eicosanoids and F2-isoprostanes represent a non-invasive tool for exploring the pathophysiology of respiratory diseases. Using immunoassays, leukotrienes (LTs), prostanoids and 8-isoprostane are increased in EBC of patients with asthma, COPD and cystic fibrosis. Liquid chromatography-mass spectrometry (LC-MS) and gas chromatography-MS enable an accurate and precise assessment of LTB<sub>4</sub> [19], LTC<sub>4</sub>, LTD<sub>4</sub> and LTE<sub>4</sub> [20], 8-isoprostane [21], and prostaglandin E<sub>2</sub> [21] concentrations in EBC in different airway diseases [22]. Some studies reported the potential utility of EBC eicosanoid and F2-isoprostane for assessing the effects of pharmacological treatment in patients with respiratory disease [1, 22-24].

Adenosine, ATP and other purines have been detected in EBC of patients with different respiratory disorders including asthma, COPD and CF by different methodology and was used to assess short-term changes in purinergic signalling of the airways during exercise-induced bronchospasm and also suggested to be used for tracking longitudinal changes in cystic fibrosis [1, 25, 26].

Finally, by-products of polyunsaturated fatty acid peroxidation, for example, malondialdehyde (MDA) can also be detected in EBC of patients with asthma, COPD and CF using HPLC [27,28]. Although elevated MDA levels reflect increased oxidative stress in these conditions, a recent study indicated that the clinical applicability of the measurement may be limited, possibly due to the high day-to-day variability for this marker in EBC [29].

#### **Metabolomics and proteomics**

Analysis of metabolomics in EBC with high-resolution nuclear magnetic resonance spectroscopy or mass spectrometry (MS) techniques enables a specific quantitative description of the endogenous metabolites, providing a metabolic "fingerprint" which can be used for classification purposes. This approach can be used for unbiased biomarker

discovery and unravelling the metabolic changes that characterise respiratory diseases. EBC metabolomic analysis can distinguish between healthy subjects and patients with various respiratory diseases, including COPD [30], stable and unstable CF [31], asthma of different inflammatory phenotypes [32], and severity [33] and primary ciliary dyskinesia [34].

Profiling the proteome of EBC is another challenging approach to study airway diseases and phenotype pulmonary patients. Application of protein microarray to EBC allows the simultaneous detection of many potential biomarkers, and thus presents an excellent tool for proteomic analysis of EBC in patients with COPD or asthma [35,36]. In some studies pooled samples are used in order to increase the protein concentration of EBC. Using this technique, it has been demonstrated that the EBC cytokine pattern of patients with certain pulmonary diseases (lung cancer, bronchiolitis obliterans) is clearly different from that of healthy subjects [37,38]. These data suggest that proteomic analysis of EBC is a useful approach to gain information about molecular signatures linked specifically to pulmonary diseases.

*Recommendations-Future research:* Further clinical studies are needed in EBC including the establishment of reference values.

## References

1. Horvath I, Hunt J, Barnes PJ, Alving K, Antczak A, Baraldi E, Becher G, van Beurden WJ, Corradi M, Dekhuijzen R, Dweik RA, Dwyer T, Effros R, Erzurum S, Gaston B, Gessner C, Greening A, Ho LP, Hohlfeld J, Jobsis Q, Laskowski D, Loukides S, Marlin D, Montuschi P, Olin AC, Redington AE, Reinhold P, van Rensen EL, Rubinstein I, Silkoff P, Toren K, Vass G, Vogelberg C, Wirtz H. Exhaled breath condensate: methodological recommendations and unresolved questions. *Eur Respir J* 2005; 26(3): 523-548.
2. Hunt JF, Fang K, Malik R, Snyder A, Malhotra N, Platts-Mills TA, Gaston B. Endogenous airway acidification. Implications for asthma pathophysiology. *Am J Respir Crit Care Med* 2000; 161(3 Pt 1): 694-699.

3. Liu L, Teague WG, Erzurum S, Fitzpatrick A, Mantri S, Dweik RA, Bleecker ER, Meyers D, Busse WW, Calhoun WJ, Castro M, Chung KF, Curran-Everett D, Israel E, Jarjour WN, Moore W, Peters SP, Wenzel S, Hunt JF, Gaston B. Determinants of exhaled breath condensate pH in a large population with asthma. *Chest* 2011; 139(2): 328-336.
4. Kostikas K, Papatheodorou G, Ganas K, Psathakis K, Panagou P, Loukides S. pH in expired breath condensate of patients with inflammatory airway diseases. *Am J Respir Crit Care Med* 2002; 165(10): 1364-1370.
5. Papaioannou AI, Loukides S, Minas M, Kontogianni K, Bakakos P, Gourgoulidis KI, Alchanatis M, Papiris S, Kostikas K. Exhaled breath condensate pH as a biomarker of COPD severity in ex-smokers. *Respir Res* 2011; 12: 67.
6. Antus B, Barta I, Kullmann T, Lazar Z, Valyon M, Horvath I, Csiszer E. Assessment of exhaled breath condensate pH in exacerbations of asthma and chronic obstructive pulmonary disease: A longitudinal study. *Am J Respir Crit Care Med* 2010; 182(12):1492-7.
7. Kullmann T, Barta I, Lázár Z, Szili B, Barát E, Valyon M, Kollai M, Horváth I. [Exhaled breath condensate pH standardised for CO<sub>2</sub> partial pressure](#). *Eur Respir J*. 2007; 29(3): 496-501.
8. Antus B, Barta I, Kullmann T, Lazar Z, Valyon M, Horvath I, Csiszer E. Assessment of exhaled breath condensate pH in exacerbations of asthma and chronic obstructive pulmonary disease: A longitudinal study. *Am J Respir Crit Care Med*. 2010 Dec 15;182(12):1492-7.
9. Antus B, Barta I, Csiszer E, Kelemen K. Exhaled breath condensate pH in patients with cystic fibrosis. *Inflamm Res*. 2012 Oct;61(10):1141-7.
10. Antus B, Barta I. Exhaled breath condensate pH in patients with lung cancer. *Lung Cancer*. 2012 Feb;75(2):178-80.
11. Soter S, Kelemen K, Barta I, Valyon M, Csiszer E, Antus B. Exhaled breath condensate pH in lung transplant recipients with bronchiolitis obliterans syndrome. *Transplantation*. 2011 Apr 15;91(7):793-7.
12. Czebe K, Kullmann T, Csiszer E, Barát E, Horvath I, Antus B. Variability of exhaled breath condensate pH in lung transplant recipients. *Respiration*. 2008;75(3):322-7.
13. Rosias P. Methodological aspects of exhaled breath condensate collection and analysis. *J Breath Res* 2012; 6(2): 027102.

14. Gajdocsi R, Bikov A, Antus B, Horvath I, Barnes PJ, Kharitonov SA. Assessment of reproducibility of exhaled hydrogen peroxide concentration and the effect of breathing pattern in healthy subjects. *J Aerosol Med Pulm Drug Deliv* 2011; 24(6): 271-275.
15. Teng Y, Sun P, Zhang J, Yu R, Bai J, Yao X, Huang M, Adcock IM, Barnes PJ. Hydrogen peroxide in exhaled breath condensate in patients with asthma: a promising biomarker? *Chest* 2011; 140(1): 108-116.
16. Kostikas K, Papatheodorou G, Psathakis K, Panagou P, Loukides S. Oxidative stress in expired breath condensate of patients with COPD. *Chest* 2003; 124(4): 1373-1380.
17. Nguyen TA, Woo-Park J, Hess M, Goins M, Urban P, Vaughan J, Smith A, Hunt J. Assaying all of the nitrogen oxides in breath modifies the interpretation of exhaled nitric oxide. *Vascul Pharmacol* 2005; 43(6): 379-384.
18. Carraro S, Giordano G, Piacentini G, Kantar A, Moser S, Cesca L, Berardi M, Di Gangi IM, Baraldi E. Asymmetric dimethylarginine in exhaled breath condensate and serum of children with asthma. *Chest* 2013; 144(2): 405-410.
19. Montuschi P, Martello S, Felli M, Mondino C, Barnes PJ, Chiarotti M. Liquid chromatography/mass spectrometry analysis of exhaled leukotriene B4 in asthmatic children. *Respir Res* 2005; 6: 119.
20. Syslova K, Bohmova A, Demirbag E, Simkova K, Kuzma M, Pelclova D, Sedlak V, Cap P, Martasek P, Kacer P. Immunomagnetic molecular probe with UHPLC-MS/MS: a promising way for reliable bronchial asthma diagnostics based on quantification of cysteinyl leukotrienes. *J Pharm Biomed Anal* 2013; 81-82: 108-117.
21. Carpenter CT, Price PV, Christman BW. Exhaled breath condensate isoprostanes are elevated in patients with acute lung injury or ARDS. *Chest* 1998; 114(6): 1653-1659.
22. Sanak M, Gielicz A, Bochenek G, Kaszuba M, Nizankowska-Mogilnicka E, Szczeklik A. Targeted eicosanoid lipidomics of exhaled breath condensate provide a distinct pattern in the aspirin-intolerant asthma phenotype. *J Allergy Clin Immunol* 2011; 127(5): 1141-1147 e1142.
23. Montuschi P, Mondino C, Koch P, Barnes PJ, Ciabattini G. Effects of a leukotriene receptor antagonist on exhaled leukotriene E4 and prostanoids in children with asthma. *J Allergy Clin Immunol* 2006; 118(2): 347-353.

24. Montuschi P, Macagno F, Parente P, Valente S, Lauriola L, Ciappi G, Kharitonov SA, Barnes PJ, Ciabattoni G. Effects of cyclo-oxygenase inhibition on exhaled eicosanoids in patients with COPD. *Thorax* 2005; 60(10): 827-833.
25. Lazar Z, Cervenak L, Orosz M, Galffy G, Komlosi ZI, Bikov A, Losonczy G, Horvath I. Adenosine triphosphate concentration of exhaled breath condensate in asthma. *Chest* 2010; 138(3): 536-542.
26. Lázár Z, Vass G, Huszár É, Losonczy G, Horváth I. Exhaled breath condensate: adenosine, ATP and other purines. *Eur Respir Mon* 2010; 49: 183-195.
27. Bartoli ML, Novelli F, Costa F, Malagrinò L, Melosini L, Bacci E, Cianchetti S, Dente FL, Di Franco A, Vagaggini B, Paggiaro PL. Malondialdehyde in exhaled breath condensate as a marker of oxidative stress in different pulmonary diseases. *Mediators Inflamm.* 2011; 2011: 891752.
28. Antus B, Drozdovszky O, Barta I, Kelemen K. Comparison of airway and aystemic malondialdehyde levels for assessment of oxidative stress in cystic fibrosis. *Lung.* 2015; 193(4): 597-604.
29. Antus B, Harnasi G, Drozdovszky O, Barta I. Monitoring oxidative stress during chronic obstructive pulmonary disease exacerbations using malondialdehyde. *Respirology.* 2014; 19(1): 74-9.
30. de Laurentiis G, Paris D, Melck D, Maniscalco M, Marsico S, Corso G, Motta A, Sofia M. Metabonomic analysis of exhaled breath condensate in adults by nuclear magnetic resonance spectroscopy. *Eur Respir J* 2008; 32(5): 1175-1183.
31. Montuschi P, Paris D, Melck D, Lucidi V, Ciabattoni G, Raia V, Calabrese C, Bush A, Barnes PJ, Motta A. NMR spectroscopy metabolomic profiling of exhaled breath condensate in patients with stable and unstable cystic fibrosis. *Thorax* 2012; 67(3): 222-228.
32. Ibrahim B, Marsden P, Morris J, Smith J, Nilsson M, Fowler SJ. Metabolomic Analysis of Exhaled Breath Condensate by NMR Spectroscopy Discriminates Inflammatory Phenotypes in Asthma. *Allergy* 2013; 68: 1050-6.
33. Carraro S, Giordano G, Reniero F, Carpi D, Stocchero M, Sterk PJ, Baraldi F. Asthma severity in childhood and metabolomic profiling of breath condensate. *Allergy* 2013; 68: 110-7.

34. Montuschi P, Paris D, Montella S, Melck D, Mirra V, Santini G, Mores N, Montemitto E, Majo F, Lucidi V, Bush A, Motta A, Santamaria F. Nuclear magnetic resonance-based metabolomics discriminates primary ciliary dyskinesia from cystic fibrosis. *Am J Respir Crit Care Med* 2014; 190(2): 229-233.
35. Matsunaga K, Yanagisawa S, Ichikawa T, Ueshima K, Akamatsu K, Hirano T, Nakanishi M, Yamagata T, Minakata Y, Ichinose M. Airway cytokine expression measured by means of protein array in exhaled breath condensate: correlation with physiologic properties in asthmatic patients. *J Allergy Clin Immunol*. 2006; 118(1): 84-90.
36. Gessner C, Scheibe R, Wötzel M, Hammerschmidt S, Kuhn H, Engelmann L, Hoheisel G, Gillissen A, Sack U, Wirtz H. Exhaled breath condensate cytokine patterns in chronic obstructive pulmonary disease. *Respir Med*. 2005; 99(10): 1229-40.
37. Kullmann T, Barta I, Csiszér E, Antus B, Horváth I. Differential cytokine pattern in the exhaled breath of patients with lung cancer. *Pathol Oncol Res*. 2008;14(4):481-3.
38. Antus B, Barta I, Czebe K, Horvath I, Csiszer E. Analysis of cytokine pattern in exhaled breath condensate of lung transplant recipients with bronchiolitis obliterans syndrome. *Inflamm Res*. 2010; 59(1): 83-6.
