# Supplementary material
Source: HighWire-hosted journal article supplement (https://erj.ersjournals.com/content/49/4/1600965)
Supplement: inline-supplementary-material-2 [file inline-supplementary-material-2.pdf]

## Online supplement 2.

### *Calibration of exhaled VOCs*

In the case of GC-MS analysis, both external and internal calibration can be used. System response can be checked using external calibration, with the aid of liquid standards [1], gas standards using permeation devices [2] or a mixture of certified calibration gases [3]. Method performance with respect to linearity, limit of quantification (LOQ), limit of detection (LOD), repeatability and reproducibility needs to be established.

Batch-to-batch response is normally checked using a pooled QC [4], though this is rather difficult for breath gas analysis. Spiking of breath samples with an isotopically labelled multi-compound gas standard, using *e.g.* deuterated compounds like acetone-d<sub>6</sub>, hexane-d<sub>14</sub>, toluene-d<sub>8</sub> and xylene-d<sub>10</sub>, covering a broad boiling point range, is preferred. This allows for monitoring any GC-MS machine drifts between breath samples. Following the discovery phase (untargeted analysis), absolute quantitative analysis (targeted analysis) can be performed using a (labelled) standard for every biomarker of interest [4]. Notably, breath samples contain several easily recognizable compounds that can be used as internal standards for daily control of retention time shifts.

### References

1. Filipiak W, Sponring A, Filipiak A, Ager C, Schubert J, Miekisch W, Amann A, Troppmair J. TD-GC-MS analysis of volatile metabolites of human lung cancer and normal cells in vitro. *Cancer Epidemiol Biomarkers Prev* 2010; 19(1): 182-195.
2. Amorim LC, Carneiro JP, Cardeal ZL. An optimized method for determination of benzene in exhaled air by gas chromatography–mass spectrometry using solid phase microextraction as a sampling technique. *J Chromatography B* 2008; 865(1): 141-146.
3. van der Schee MP, Fens N, Brinkman P, Bos LD, Angelo MD, Nijssen TM, Raabe R, Knobel HH, Vink TJ, Sterk PJ. Effect of transportation and storage using sorbent tubes of exhaled breath samples on diagnostic accuracy of electronic nose analysis. *J Breath Res* 2013; 7(1): 016002.

4. Koek MM, Jellema RH, van der Greef J, Tas AC, Hankemeier T. Quantitative metabolomics based on gas chromatography mass spectrometry: status and perspectives. *Metabolomics* 2011; 7(3): 307-328.
