# Supplementary material
Source: HighWire-hosted journal article supplement (https://erj.ersjournals.com/content/49/4/1600965)
Supplement: inline-supplementary-material-6 [file inline-supplementary-material-6.pdf]

# Clinical research form

Patients' code: .....

Weight: ..... kg

Height: ..... cm

Age: ..... years

1. Do you smoke now?

NO YES  
☐ ☐

2. Have you ever smoked as long as for one year?

NO YES  
☐ ☐

3. Do you have any known allergies?

If yes, against what .....

NO YES  
☐ ☐

4. Are you having a cold now?

NO YES  
☐ ☐

5. Do you have any respiratory diseases?

NO YES  
☐ ☐

6. Do you have any chronic diseases?

NO YES  
☐ ☐

7. Have you eaten large quantities of vegetables during the last hours?  
(especially lettuce or spinach)

NO YES  
☐ ☐

8. Have you had tea or coffee during the last hours?

NO YES  
☐ ☐

9. Have you exercised the hour before the clinical visit?

NO YES  
☐ ☐

10. Are you regularly exposed to tobacco smoke?  
(regularly = most days or nights)

NO YES  
☐ ☐

11. Mouthwash performed

NO YES  
☐ ☐

| Measurements                     | 1 | 2 | 3 | 4 | 5 | 6 | 7 | 8 |
|----------------------------------|---|---|---|---|---|---|---|---|
| Flow-rate ( $\text{mL s}^{-1}$ ) |   |   |   |   |   |   |   |   |
| $F_{\text{E}}\text{NO}$ (ppb)    |   |   |   |   |   |   |   |   |

Environmental NO concentration in the laboratory: ..... ppb

|              | $F_{\text{E}}\text{NO}_{50}$ (ppb) | $C_{\text{A}}\text{NO}$ (ppb) | $J_{\text{aw}}\text{NO}$ (nL/s) | $C_{\text{aw}}\text{NO}$ (ppb) | $D_{\text{aw}}\text{NO}$ (mL/s) |
|--------------|------------------------------------|-------------------------------|---------------------------------|--------------------------------|---------------------------------|
| NO estimates |                                    |                               |                                 |                                |                                 |

Observations .....  
.....  
.....

Investigator: .....

Date .....
